# Supplementary material for: Knowledge and Willingness to Utilize Hepatitis B Preventive Measures among Pregnant Women in Ado-Ekiti, Southwest, Nigeria
Source: Interdiscip Perspect Infect Dis. 2023 Nov 16;2023:9168038. doi: 10.1155/2023/9168038 (PMC10667044; doi:10.1155/2023/9168038)
Supplement: Supplementary Materials — Data collection instrument: a questionnaire was used for data collection. Supplementary Table 1: association between socio-demographic characteristics of respondents and the level of knowledge about hepatitis B infection disaggregated by place of receiving ante-natal care. Supplementary Table 2: association between the respondents' level of knowledge and willingness to uptake hepatitis B prevention services by place of receiving ante-natal care. [file 9168038.f1.zip]

Archive with 2 entries (2 files):
- PMTCT OF HEPATITIS B INFECTION QUESTIONNAIRE.doc
- Supplementary  Tables IDID.doc
